# Supplementary material for: 2P2Ichem: focused chemical libraries dedicated to orthosteric modulation of protein–protein interactions
Source: Royal Society of Chemistry journal article supplement (doi:10.1039/c3md00018d), 2013-01-01
Supplement: c3md00018d.pdf [file c3md00018d.pdf]

## Supplementary Material

**Figure S1.** Overview of *in silico* PPI chemical libraries resulting from this work. 25 chemical libraries from the main providers representing more than 8.3 million compounds were filtered with our SVM-based 2P2I<sub>HUNTER</sub> tool and 'Ro4' rules to lead to the reference PPI library (2P2I<sub>REF</sub> composed of 143,218 compounds corresponding to 22,845 diverse compounds as estimated with Tanimoto index 0.8). a) We then selected compounds containing at least one privileged scaffold as recently defined by Welsch and colleagues<sup>27</sup>. The resulting 35 sets of compounds containing a given privileged scaffold were pooled together and duplicates were removed. The resulting 2P2I<sub>PRIV</sub> library contained 51,476 compounds. b) A diverse representative subset (2P2I<sub>DIV</sub>) composed of 8,217 compounds was built from 2P2I<sub>PRIV</sub> in three steps. i/ Optimizable k-dissimilarity (OptiSim) selection implemented in TRIPOS<sup>24</sup> (Tanimoto cut-off= 0.8) was applied to each of the 35 privileged structure sets, ii/ compounds were then combined in one library, and duplicates were removed iii/ a diversity selection was performed on the combined set with OptiSim (Tanimoto cut-off= 0.8) . c) Finally, compounds with higher three-dimensionality were selected to escape from flatland, using carbon bond saturation descriptor as defined by fraction sp<sup>3</sup> (Fsp<sup>3</sup>) where Fsp<sup>3</sup> is the number of sp<sup>3</sup> hybridized carbons divided by the total carbon count<sup>37</sup>. The resulting diverse PPI targeted library (2P2I<sub>3D</sub>) is composed of 1,683 small molecules.

**25 Commercial Libraries**  
**(8.3 Millions)**

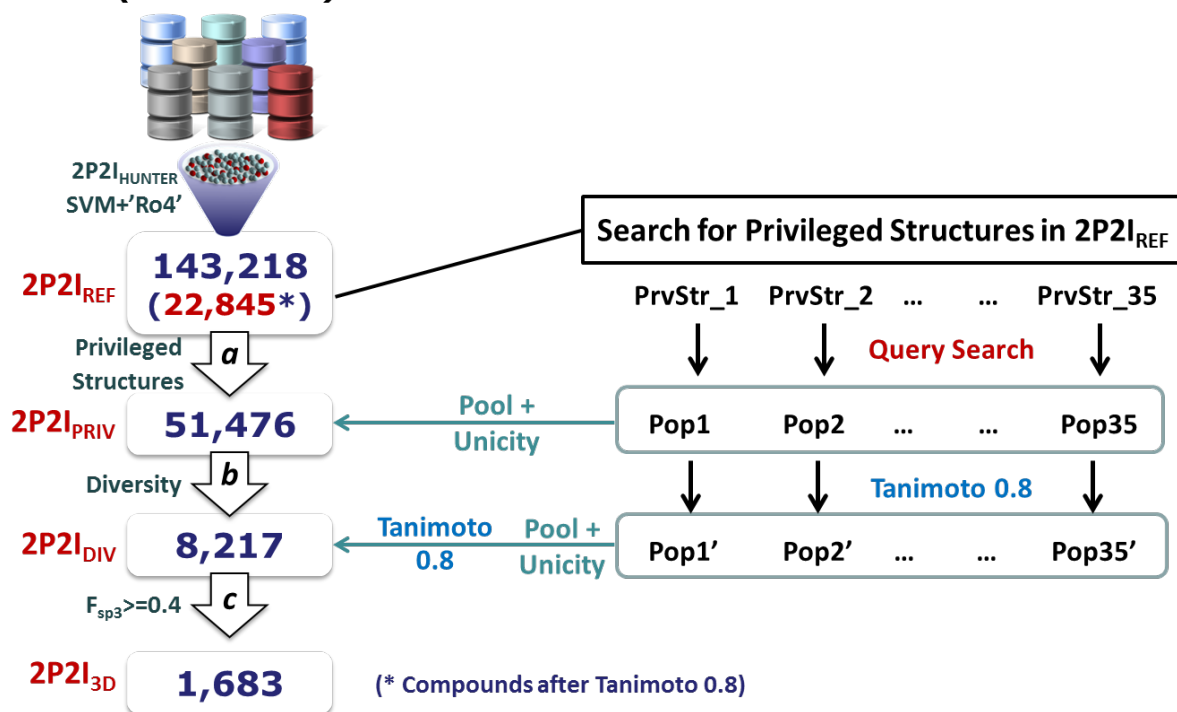

**Figure S1**

**Figure S2:** Cumulative percent distribution of 2-ring scaffolds in 2P2I<sub>REF</sub>. Another representation of these data expressed in numerical population for each of the 3,973 scaffolds is found in the bubble-shaped Figure 2. Here, the graph shows a rapid growth as the top 1% of the total scaffolds (top 40 most populated scaffolds) stands for the ancestors of as much as 50% of the compounds in 2P2I<sub>REF</sub> (inset).

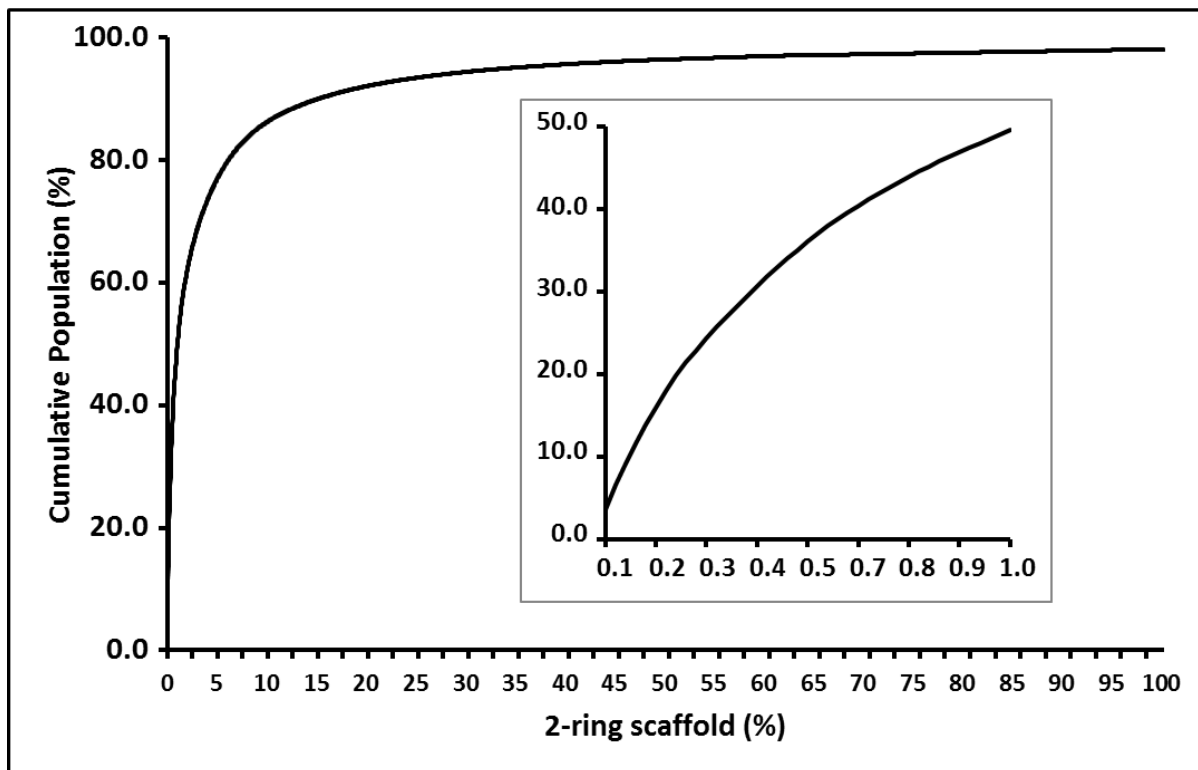

**Figure S2**

**Figure S3: 2D PCA plot of training dataset used in 2P2I<sub>HUNTER</sub> and 2P2I<sub>3D</sub> chemical library.** The 1,683 compounds (light blue spheres) from the final *in silico* PPI-targeted library 2P2I<sub>3D</sub> were projected in the chemical space of compounds used as the training set during the development of 2P2I<sub>HUNTER</sub>.<sup>22</sup> Orthosteric PPI modulators used as a positive set in the SVM model are shown as red squares, whereas decoy compounds are shown as grey spheres.

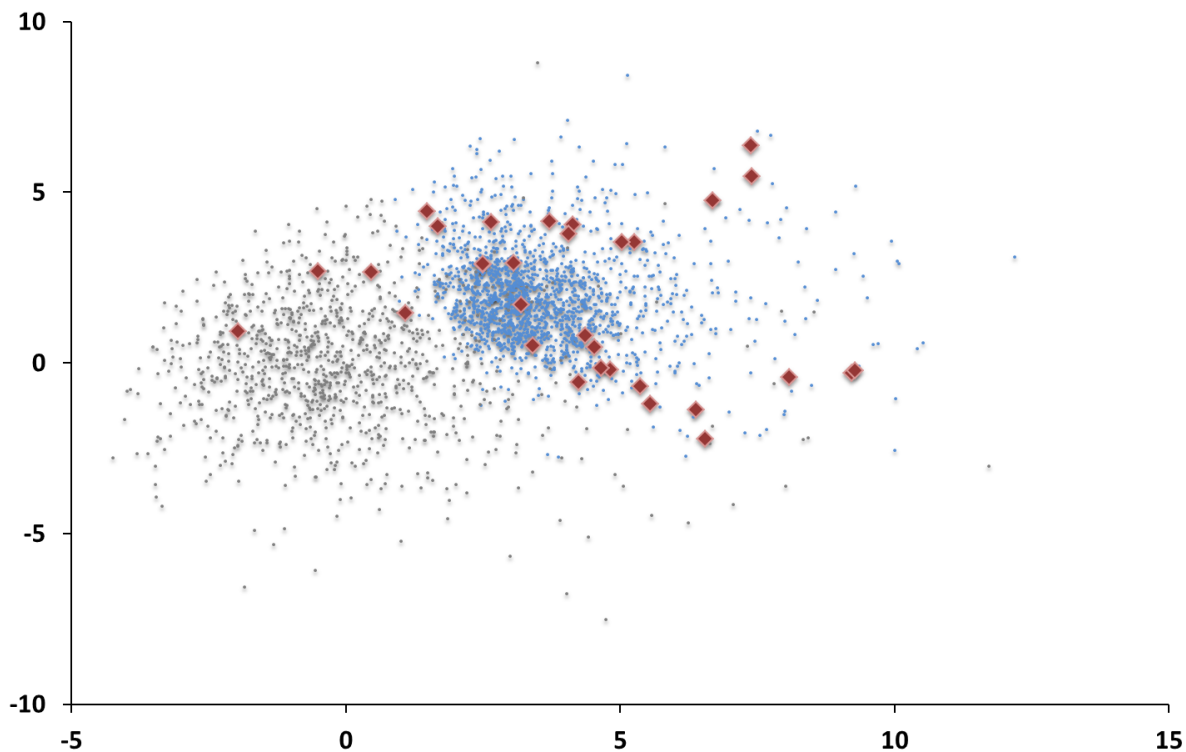

**Figure S3**

**Figure S4:** Percentage of compounds in 2P2I<sub>3D</sub> that can be purchased from each provider. Only providers from which at least 5% of the compounds can be acquired are labeled in the picture. (The total amount is greater than 100% because the same compound can be obtained from different providers).

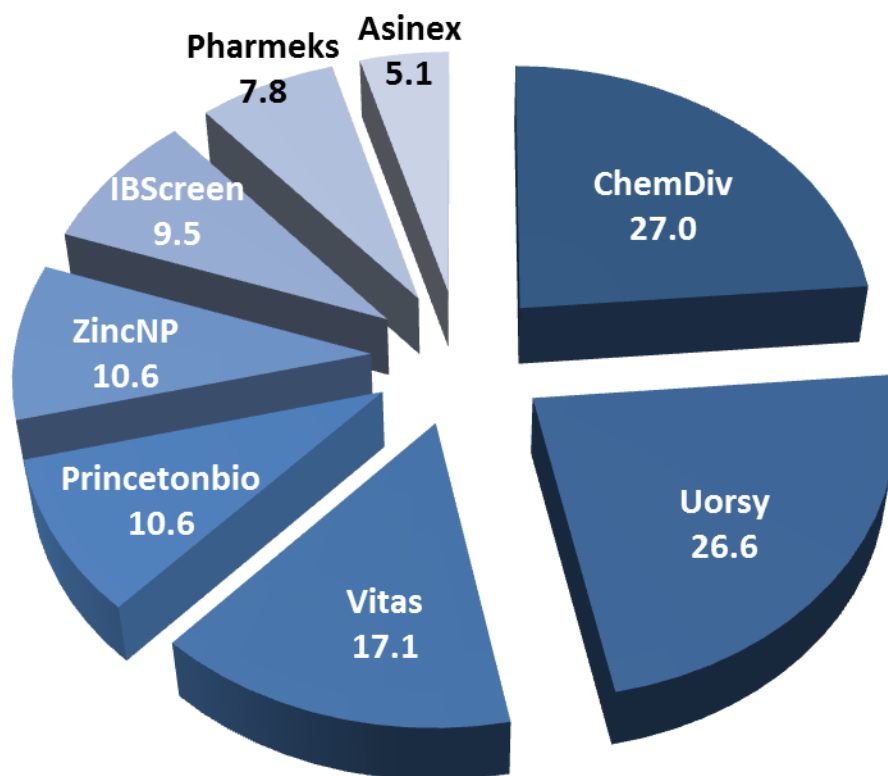

**Figure S4**
